# Supplementary material
Source: PubMed Central journal article supplement (PMC10116568)
Supplement: NIHMS1891456-supplement-Supplemental_references.pdf [file NIHMS1891456-supplement-Supplemental_references.pdf]

**Supplementary information**

---

**Fungal taxonomy and sequence-based nomenclature**

---

In the format provided by the authors and unedited

**Supplementary File S1:** References for timeline events depicted in Fig. 2.

|                                                                                                                                                   |           |                                                                                                         |                                                                                                                                                                                                                                                                                                                                                                                   |
|---------------------------------------------------------------------------------------------------------------------------------------------------|-----------|---------------------------------------------------------------------------------------------------------|-----------------------------------------------------------------------------------------------------------------------------------------------------------------------------------------------------------------------------------------------------------------------------------------------------------------------------------------------------------------------------------|
| Fundamentals of fungal classification (Micheli)                                                                                                   | 1729      |                                                                                                         | Micheli, P. A. <i>Nova Plantarum Genera</i> . Typis Bernardi Paperinii, Florentiae (1729).                                                                                                                                                                                                                                                                                        |
|                                                                                                                                                   | 1753      | Start of botanical and mycological nomenclature (Linnaeus)                                              | Linnaeus, C. <i>Species Plantarum</i> . Impensis Laurentii Salvii, Holmiae (1753).                                                                                                                                                                                                                                                                                                |
| Names of <i>Uredinales</i> , <i>Ustilaginales</i> , <i>Gasteromycetes</i> adopted by Persoon ( <i>Synopsis Methodica Fungorum</i> ) have priority | 1801      |                                                                                                         | Persoon, C. H. <i>Synopsis Methodica Fungorum</i> . Henricum Dieterich, Gottingae (1801).                                                                                                                                                                                                                                                                                         |
|                                                                                                                                                   | 1821      | Names of other fungi (except slime molds) adopted by Fries ( <i>Systema Mycologicum</i> ) have priority | Fries, E. <i>Systema Mycologicum. Officina Berlingiana, Lundae</i> (1821-1832). Three Volumes.                                                                                                                                                                                                                                                                                    |
| First use of the term mycology (Berkeley)                                                                                                         | 1836      |                                                                                                         | Berkeley, M. J. <i>The English Flora</i> (Hooker, W. J., ed.). Vol. V, Part II: <i>Fungi</i> . Longman et al., London (1836).                                                                                                                                                                                                                                                     |
|                                                                                                                                                   | 1866–1867 | Discovery of dual nature of lichens (De Bary, Schwendener)                                              | De Bary, A. <i>Morphologie und Physiologie der Pilze, Flechten und Myxomyceten</i> (Hofmeisters Handbuch der Physiologischen Botanik, II). Engelmann, Leipzig (1866); Anonymous. Protokoll der botanischen Sektion. <i>Verh. Schweiz. Naturf. Gesellsch.</i> <b>1867</b> , 88-91 (1867).                                                                                          |
| Separate classification of asexual morphs of fungi                                                                                                | 1870      |                                                                                                         | Fuckel, L..W.G. <i>Symbolae mycologicae. Jahrb. Nass. Ver. Naturk.</i> <b>23-24</b> , 456 (1870).                                                                                                                                                                                                                                                                                 |
|                                                                                                                                                   | 1883      | First pure culture of <i>Saccharomyces</i> (Hansen)                                                     | Hansen, E. C. Undersøgelser over Alkoholgjaersvampenes Fysiologi og Morfologi. II. Om Askosporedannelsen hos Slægten <i>Saccharomyces</i> . Medd. f. Carlsberg Lab. <b>2</b> , 29-102 (1883); Barnett, J. A. & Lichtenthaler, F. W. A history of research on yeasts 3: Emil Fischer, Eduard Buchner and their contemporaries, 1880-1900. <i>Yeast</i> <b>18</b> , 363-388 (2001). |
| First fungal culture collection (MUCL)                                                                                                            | 1894      |                                                                                                         | Uruburu F. History and services of culture collections. <i>Int. Microbiol.</i> <b>6</b> , 101-103 (2003); Boundy-Mills, K. L. et al. Yeast culture collections in the twenty-first century: New opportunities and challenges. <i>Yeast</i> <b>33</b> , 243-260 (2016).                                                                                                            |
|                                                                                                                                                   | 1909      | Synopsis of, and keys to all fungal genera                                                              | Clements, F. E. <i>The Genera of Fungi</i> . Wilson, New York (1909); updated as: Clements, F. E. & Shear, C. L. <i>The Genera of Fungi</i> . Wilson, New York (1931).                                                                                                                                                                                                            |
| Dual nomenclature for fungi with pleomorphic life cycles                                                                                          | 1912      |                                                                                                         | Briquet, J. et al. <i>International Rules of Botanical Nomenclature: Adopted by the International Botanical Congress of Vienna 1905 and Brussels 1910</i> . Fischer, Jena (1912).                                                                                                                                                                                                 |
|                                                                                                                                                   | 1932      | Ascolocular versus ascohymenial <i>Ascomycetes</i> (Nannfeldt)                                          | Nannfeldt, J. A Studien über die Morphologie und Systematik der nicht-lichenisierten inoperculaten Discomyceten. <i>Nov. Act. Reg. Soc. Upsal.</i> <b>8</b> , 1-368 (1932).                                                                                                                                                                                                       |
| Start of <i>Index of Fungi</i>                                                                                                                    | 1940      |                                                                                                         | Petersen, R. H. & Hawksworth, D. L. Notable historical databases of fungal names. <i>IMA Fungus</i> <b>7(1)</b> , A28-A41 (2016).                                                                                                                                                                                                                                                 |
|                                                                                                                                                   | 1943      | First edition of the <i>Dictionary of the Fungi</i>                                                     | Ainsworth, G. C. & Bisby, C. R. (1943) A Dictionary of the Fungi. First Edition. Imperial Mycological Institute, ...                                                                                                                                                                                                                                                              |
| Transmission electron microscopy in mycology                                                                                                      | 1950      |                                                                                                         | Gregory, P. H. & Nixon, H. L. Electron micrographs of spores of some British gasteromycetes. <i>Trans. Brit. Mycol. Soc.</i> <b>33</b> , 359-363 (1950); Klomparens, K. L. The development and application of ultrastructural research in mycology. <i>Mycopathologia</i> <b>109</b> , 139-148 (1990).                                                                            |

|                                                                  |               |                                                                                                                                |                                                                                                                                                                                                                                                                                                                                                                                                                                                                                                                                 |
|------------------------------------------------------------------|---------------|--------------------------------------------------------------------------------------------------------------------------------|---------------------------------------------------------------------------------------------------------------------------------------------------------------------------------------------------------------------------------------------------------------------------------------------------------------------------------------------------------------------------------------------------------------------------------------------------------------------------------------------------------------------------------|
|                                                                  | 1950/<br>1952 | Names of lichens apply to fungal component                                                                                     | <i>Seventh International Botanical Congress, Stockholm, July 1950</i> ; Lanjouw, J. et al. <i>International Code of Botanical Nomenclature, Adopted by the Seventh International Botanical Congress, Stockholm, July 1950</i> (Regnum Vegetabile 3). International Bureau for Plant Taxonomy and Nomenclature of the International Association for Plant Taxonomy, Utrecht (1952).                                                                                                                                              |
| First proposal for registration of fungi                         | 1955          |                                                                                                                                | Ainsworth, G. C. & Ciferri, R. Mycological taxonomic literature and publication. <i>Taxon</i> <b>4</b> , 3-6 (1955).                                                                                                                                                                                                                                                                                                                                                                                                            |
|                                                                  | 1965          | Scanning electron microscopy in mycology                                                                                       | Greenhalgh, G. N. A note on the conidial scar in the Xylariaceae. <i>New Phytol.</i> <b>66</b> , 65-66 (1967); Jones D. Examination of mycological specimens in the scanning electron microscope. <i>Trans. Br. Mycol. Soc.</i> <b>50</b> , 690-691 (1967).                                                                                                                                                                                                                                                                     |
| Species pairs in lichen fungi (Poelt)                            | 1970          |                                                                                                                                | Poelt, J. Das Konzept der Artenpaare bei den Flechten. <i>Dtsch. Bot. Gesellsch., N.F.</i> <b>4</b> , 187-198 (1970).                                                                                                                                                                                                                                                                                                                                                                                                           |
|                                                                  | 1971          | International Mycological Association founded                                                                                  |                                                                                                                                                                                                                                                                                                                                                                                                                                                                                                                                 |
| API 20 system for microbe identification (later including fungi) | 1972          |                                                                                                                                | Smith, P. B. et al. API system: a multitube micromethod for identification of Enterobacteriaceae. <i>Appl. Microbiol.</i> <b>24</b> , 449-452 (1972); de Louvois, J., Mulhall, A. & Hurley, R. Biochemical identification of clinically important yeasts. <i>Journal of Clinical Pathology</i> <b>32</b> , 715-718 (1979); Bridge, P. D. & Hawksworth, D. L. The API ZYM enzyme testing system as an aid to the rapid identification of <i>Penicillium</i> isolates. <i>Microbiological Sciences</i> <b>1</b> , 232-234 (1984). |
|                                                                  | 1981          | End of separate starting points for fungal nomenclature                                                                        | Thirteenth International Botanical Congress, Sydney, August, 1981 (effective immediately voted through).                                                                                                                                                                                                                                                                                                                                                                                                                        |
| International Commission on the Taxonomy of Fungi (ICTF)         | 1982          |                                                                                                                                | Twelfth International Microbiological Congress, Boston, USA, 1982.                                                                                                                                                                                                                                                                                                                                                                                                                                                              |
|                                                                  | 1981/<br>1983 | Sanctioning of fungal names adopted by Persoon ( <i>Synopsis Methodica Fungorum</i> ) and Fries ( <i>Systema Mycologicum</i> ) | <i>Thirteenth International Botanical Congress, Sydney, August, 1981</i> ; Voss, E. G., et al. <i>International Code of Botanical Nomenclature: Adopted by the Thirteenth International Botanical Congress, Sydney, August, 1981</i> . Bohn, Scheltema and Holkema, Utrecht & W. Junk, Boston (Regnum Veg. 111) (1983).                                                                                                                                                                                                         |
| First concept of molecular taxonomy of fungi                     | 1985          |                                                                                                                                | Kurtzman, C. P. Molecular taxonomy of the fungi. In: Bennett, J. W. & Lasure, L. L. (eds.), <i>Gene Manipulations in Fungi</i> , 35-63. Academic Press, New York (1985).                                                                                                                                                                                                                                                                                                                                                        |
|                                                                  | 1986          | Launch of <i>Systema Ascomycetum</i>                                                                                           | Eriksson, O. E. Revision of "Outline of the ascomycetes – 1982". <i>Systema Ascomycetum</i> <b>1</b> , 1-16 (1982); Eriksson, O. E. <i>Systema Ascomycetum</i> (1982–1998). <i>IMA Fungus</i> <b>6(1)</b> , (25)–(27).                                                                                                                                                                                                                                                                                                          |
| First rRNA fungal PCR primers introduced                         | 1990          |                                                                                                                                | White, T. J. et al. Amplification and direct sequencing of ribosomal RNA genes and the internal transcribed spacer in fungi. In: Innis, M. A. et al. (eds.), <i>PCR-Protocols and Applications – A Laboratory Manual</i> , 315–322. Academic Press, New York (1990).                                                                                                                                                                                                                                                            |
|                                                                  | 1991          | First proposal to abandon dual nomenclature                                                                                    | Reynolds, D. R. & Taylor, J. W. Nucleic acids and nomenclature: name stability under Article 59. In: <i>Improving the Stability of Names: Needs and Options</i> (Hawksworth, D.L., ed.), 171-177. [Regnum Veget. Vol. 123] Koeltz Scientific Books, Koenigstein (1991).                                                                                                                                                                                                                                                         |
| First DNA barcoding in fungi                                     | 1994          |                                                                                                                                |                                                                                                                                                                                                                                                                                                                                                                                                                                                                                                                                 |
|                                                                  | 1996          | First eukaryote genome ( <i>Saccharomyces cerevisiae</i> )                                                                     | Johnston, M. Genome sequencing: The complete code for a eukaryotic cell. <i>Curr. Biol.</i> <b>6</b> , 500-503 (1996).                                                                                                                                                                                                                                                                                                                                                                                                          |
| VITEK 2 system for identification of microbes including fungi    | 1997          |                                                                                                                                | Gayral, J.-P. et al., VITEK 2 automated antimicrobial susceptibility test system. <i>8th European Congress of Clinical Microbiology &amp; Infectious Diseases, Lausanne, Switzerland, Clinical Microbiology and Infection (1997)</i> .                                                                                                                                                                                                                                                                                          |
|                                                                  | 2000          | <i>Index Fungorum</i> online                                                                                                   | Kirk, P. M. World catalogue of 340K fungal names on-line. <i>Mycological Research</i> <b>104</b> , 516-517 (2000).                                                                                                                                                                                                                                                                                                                                                                                                              |
| Genealogical concordance to delimit fungal species               | 2000          |                                                                                                                                | Taylor, J. W. et al. Phylogenetic species recognition and species concepts in fungi. <i>Fung. Gen. Biol.</i> <b>31</b> , 21-32 (2000).                                                                                                                                                                                                                                                                                                                                                                                          |

|                                                                                            |      |                                                                                 |                                                                                                                                                                                                                                                                                                                                                                                                 |
|--------------------------------------------------------------------------------------------|------|---------------------------------------------------------------------------------|-------------------------------------------------------------------------------------------------------------------------------------------------------------------------------------------------------------------------------------------------------------------------------------------------------------------------------------------------------------------------------------------------|
|                                                                                            | 2001 | Oomycota placed in Straminipila                                                 | Cavalier-Smith, T. What are fungi? In: McLaughlin, D. M. et al. (eds.), <i>Systematics and Evolution, Part A</i> (The Mycota VII), 3-37. Springer, Berlin, Heidelberg (2001).                                                                                                                                                                                                                   |
| First filamentous fungus genome ( <i>Neurospora crassa</i> )                               | 2003 |                                                                                 | Galagan, J. E. et al. The genome sequence of the filamentous fungus <i>Neurospora crassa</i> . <i>Nature</i> <b>422</b> , 859-868 (2003).                                                                                                                                                                                                                                                       |
|                                                                                            | 2004 | Mycobank launched                                                               | Crous, P. W. et al. MycoBank: an online initiative to launch mycology into the 21st century. <i>Stud. Mycol.</i> <b>50</b> , 19-22 (2004).                                                                                                                                                                                                                                                      |
| Oldest unambiguous fungal fossil with sexual morph ( <i>Paleopyrenomycites devonicus</i> ) | 2004 |                                                                                 | Taylor, T. N. et al. Perithecial ascomycetes from the 400 million year old Rhynie chert: an example of ancestral polymorphism. <i>Mycologia</i> <b>96</b> , 1403-1419 (2004).                                                                                                                                                                                                                   |
|                                                                                            | 2006 | Introduction of MALDI-TOF system for identification of microbes including fungi | Maier, T. et al. Fast and reliable MALDI-TOF MS-based microorganism identification. <i>Nature Meth.</i> <b>3</b> , i-ii (2006).                                                                                                                                                                                                                                                                 |
| Integrated formal higher taxonomy of Fungi                                                 | 2007 |                                                                                 | Hibbett, D. S. et al. A higher-level phylogenetic classification of the Fungi. <i>Mycol. Res.</i> <b>111</b> , 509-547 (2007).                                                                                                                                                                                                                                                                  |
|                                                                                            | 2011 | Amsterdam Declaration on Fungal Nomenclature ("One fungus = one name")          | Taylor, J. W. One Fungus = One Name: DNA and fungal nomenclature twenty years after PCR. <i>IMA Fungus</i> <b>2</b> , 113-120 (2011); Hawksworth, D. L. et al. Amsterdam Declaration on Fungal Nomenclature. <i>IMA Fungus</i> <b>2</b> , 105-112 (2011).                                                                                                                                       |
| Abandonment of dual nomenclature for fungi with pleomorphic life cycles                    | 2011 |                                                                                 | <i>Eighteenth International Botanical Congress, Melbourne, 2011</i> ; McNeill, J. & Turland, N. J. Major changes to the Code of Nomenclature - Melbourne, July 2011. <i>Taxon</i> <b>60</b> , 1495-1497 (2011); McNeill, J., et al. <i>International Code of Nomenclature for algae, fungi and plants (Melbourne Code)</i> (Regnum Vegetabile 154). Koeltz Scientific Books, Königstein (2012). |
|                                                                                            | 2012 | ITS designated as universal barcode for fungi                                   | Schoch, C.L. et al. Nuclear ribosomal internal transcribed spacer (ITS) region as a universal DNA barcode marker for Fungi. <i>Proc. Natl. Acad. Sci. U. S. A.</i> <b>109</b> , 6241-6246 (2012).                                                                                                                                                                                               |
| NCBI RefSeq Targeted Loci project for ITS initiated                                        | 2012 |                                                                                 | Schoch, C. L. et al. Finding needles in haystacks: linking scientific names, reference specimens and molecular data for Fungi. <i>Database</i> <b>2014</b> , bau061 (2014).                                                                                                                                                                                                                     |
|                                                                                            | 2012 | Electronic publication of valid names                                           | <i>Eighteenth International Botanical Congress, Melbourne, 2011</i> ; McNeill, J., et al. <i>International Code of Nomenclature for algae, fungi and plants (Melbourne Code)</i> (Regnum Vegetabile 154). Koeltz Scientific Books, Königstein (2012).                                                                                                                                           |
| Obligate registration for valid publication of new fungal names                            | 2013 |                                                                                 | <i>Eighteenth International Botanical Congress, Melbourne, 2011</i> ; McNeill, J., et al. <i>International Code of Nomenclature for algae, fungi and plants (Melbourne Code)</i> (Regnum Vegetabile 154). Koeltz Scientific Books, Königstein (2012).                                                                                                                                           |
|                                                                                            | 2017 | Separate governance by the IMC for nomenclatural rules specific to fungi        | <i>Nineteenth International Botanical Congress, Shenzhen, China, 2017</i> ; Turland, N. J., et al. <i>International Code of Nomenclature for algae, fungi and plants (Shenzhen Code)</i> [Regnum Vegetabile 159]. Koeltz Scientific Books, Glashütten (2018).                                                                                                                                   |
| Panel debates formal nomenclature of fungi known from DNA sequences only at the IMC11      | 2018 |                                                                                 | May, T. W. et al. XI International Mycological Congress: report of Congress action on nomenclature proposals relating to fungi. <i>IMA Fungus</i> <b>9(2)</b> , xxii-xxvii (2018).                                                                                                                                                                                                              |
|                                                                                            | 2019 | Obligate registration for valid designation of new typifications                | Eleventh International Mycological Congress, San Juan, Puerto Rico, 2018; May, T. W. et al. 2019. Chapter F of the International Code of Nomenclature for algae, fungi, and plants as approved by the 11th International Mycological Congress, San Juan, Puerto Rico, July 2018. <i>IMA Fungus</i> <b>10(1)</b> , 21.                                                                           |
